# Supplementary material
Source: Research Square preprint supplement (doi:10.21203/rs.3.rs-9500978/v1)
Supplement: Supplementary file 1 [file eabd54ce6a65c28ca0095d33.docx]

**Supplemental Table 1.**Diabetes rates across younger patient cohorts undergoing phacoemulsification

| **Variable** | **40-45** | **45-50** | **50-55** | **55-60** |
| --- | --- | --- | --- | --- |
| Type 2 Diabetes Mellitus | 803 (45%) vs 55,922 (9%)  P<0.0001 | 1,725 (48%) vs 71,373 (11%)  P<0.0001 | 3,359 (47%) vs 85,651 (14%)  P<0.0001 | 5,732 (45%) vs 98.447 (16%)  P<0.0001 |
| Type 1 Diabetes Mellitus | 308 (17%) vs 7038 (1%)  P<0.0001 | 589 (16%) vs 7,966 (1%)  P<0.0001 | 988 (14%) vs 8,699 (1%)  P<0.0001 | 1,375 (11%) vs 9,346 (2%)  P<0.0001 |
| Mean Hemoglobin A1C | 6.96 vs 5.97   P<0.0001 | 6.84 vs 6.09  P<0.0001 | 6.73 vs 6.18  P<0.0001 | 6.52 vs 6.23  P<0.0001 |

*Across all cohorts below the age of 60 years, patients who underwent phacoemulsification had significantly higher rates of diabetes than those who did not. Mean hemoglobin A1C levels were consistently higher among patients who underwent phacoemulsification (all p<0.001).*
